# Supplementary material for: Structural Racism and Adolescent Mental Health Disparities in Northern California
Source: PubMed Central journal article supplement (PMC10439477; doi:10.1001/jamanetworkopen.2023.29825), 2023-08-18
Supplement: jamanetwopen-e2329825-s001.pdf [file jamanetwopen-e2329825-s001.pdf]

## Data Sharing Statement

Acker. Structural Racism and Adolescent Mental Health Disparities in Northern California. *JAMA Netw Open*. Published August 18, 2023. doi:10.1001/jamanetworkopen.2023.29825

### Data

**Data available:** No

### Additional Information

**Explanation for why data not available:** The datasets generated and/or analyzed during the current study are not publicly available due to our institutional policy. Individuals who are interested in accessing the data may contact the corresponding author regarding [or to discuss or set up] a data use agreement
